# Supplementary material for: Sulfonylcalix[4]arene functionalized nanofiber membranes for effective removal and selective fluorescence recognition of terbium(iii) ions
Source: Royal Society of Chemistry journal article supplement (doi:10.1039/c8nj00045j), 2018-01-01
Supplement: c8nj00045j1.pdf [file c8nj00045j1.pdf]

## Supporting Information

# Sulfonylcalix[4]arene functionalized nanofiber membranes for effective removal and selective fluorescence recognition of terbium(III) ions

Weikang Hua<sup>a</sup>, Min Wang<sup>a</sup>, Peiyun Li<sup>a</sup>, Ke Shen<sup>a</sup> and Xuefen Wang<sup>a\*</sup>, Benjamin S. Hsiao<sup>b</sup>

<sup>a</sup>State Key Laboratory for Modification of Chemical Fibers and Polymer Materials, College of Materials Science and Engineering, Donghua University, Shanghai, 201620, P.R. China

<sup>b</sup>Department of Chemistry, Stony Brook University, Stony Brook, NY 11794, USA

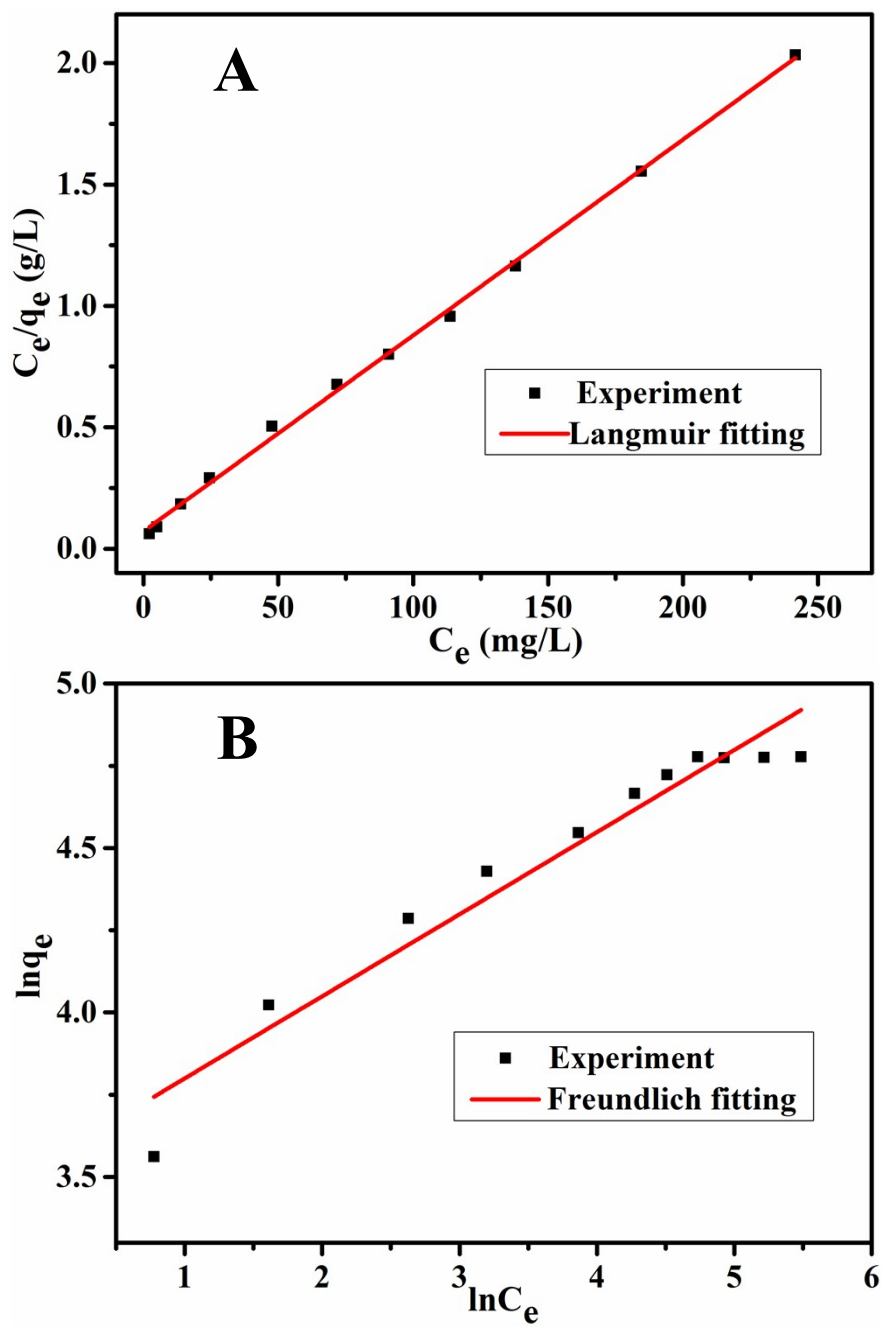

**Figure S1.** Adsorption isotherms of  $Tb^{3+}$  ions on sulfonycalix[4]arene functionalized APAN nanofibrous membrane according to the Langmuir equation (A) and the Freundlich equation (B).

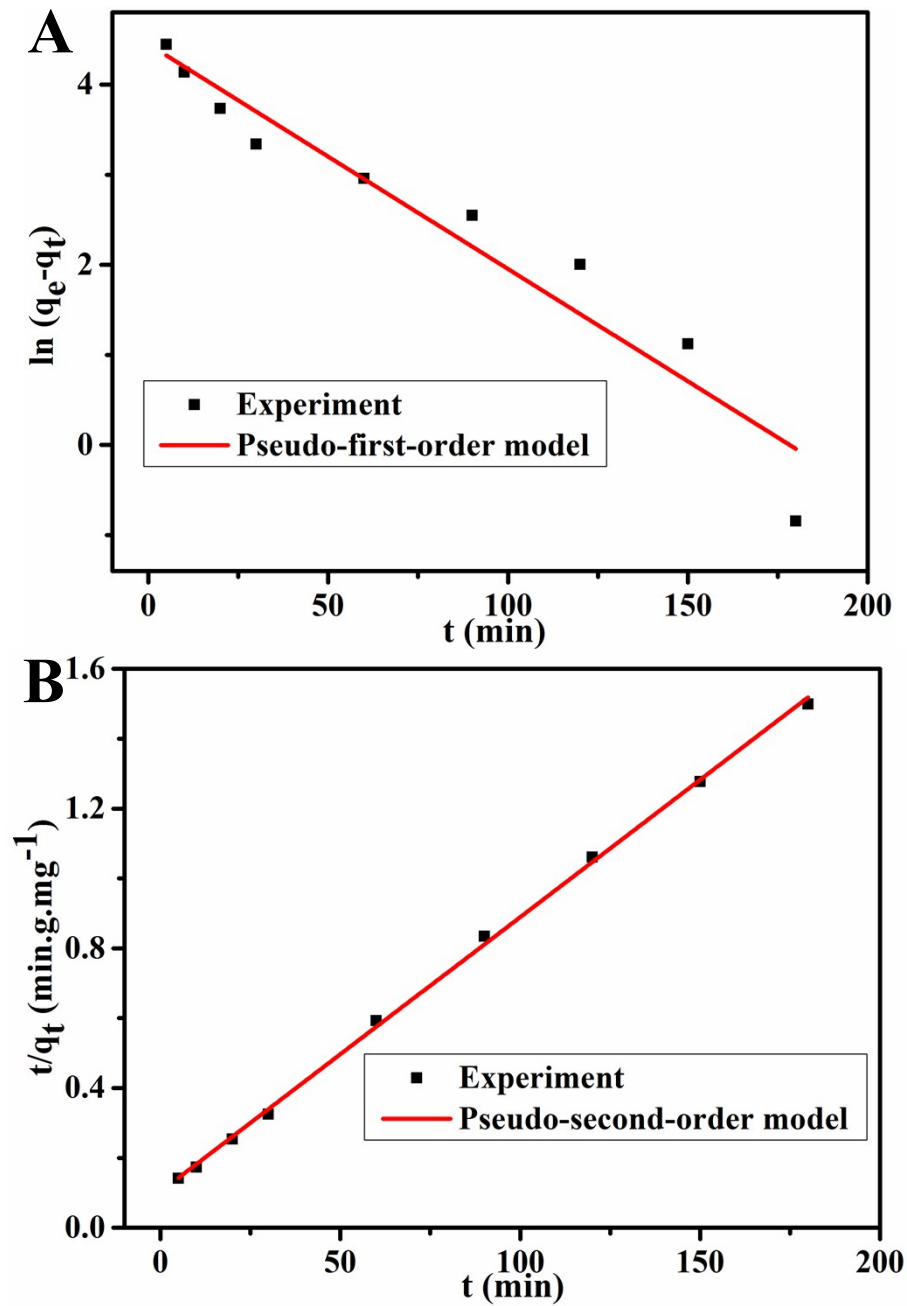

**Figure S2.** Pseudo-first-order kinetic model (A) and pseudo-second-order kinetic model (B) for the adsorption of  $Tb^{3+}$  ions on sulfonylcalix[4]arene functionalized APAN nanofibrous membrane.

**Table S1.** Langmuir and Freundlich constants for the adsorption of Tb<sup>3+</sup> ions on sulfonycalix[4]arene functionalized APAN nanofibrous membrane

| Langmuir constants |            |        | Freundlich constants |      |        |
|--------------------|------------|--------|----------------------|------|--------|
| $q_0$ (mg/g)       | $b$ (L/mg) | $R^2$  | $K_F$ (mg/g)         | $n$  | $R^2$  |
| 123.92             | 0.11       | 0.9982 | 34.82                | 4.01 | 0.9388 |

**Table S2.** Adsorption kinetic parameters for the adsorption of Tb<sup>3+</sup> ions on sulfonycalix[4]arene functionalized APAN nanofibrous membrane

| Pseudo-first-order model |                           |        | Pseudo-second-order model |                                               |        |
|--------------------------|---------------------------|--------|---------------------------|-----------------------------------------------|--------|
| $q_e$ (mg/g)             | $K_1$ (mg <sup>-1</sup> ) | $R^2$  | $q_e$ (mg/g)              | $K_2$ (mg g <sup>-1</sup> min <sup>-1</sup> ) | $R^2$  |
| 85.45                    | 0.0249                    | 0.9261 | 127.23                    | $5.96 \times 10^{-4}$                         | 0.9990 |
